# Supplementary material
Source: publisher figshare collection journal article supplement (https://acs.figshare.com/ndownloader/files/4410826)
Supplement: Supplementary file 1 [file 4410826]

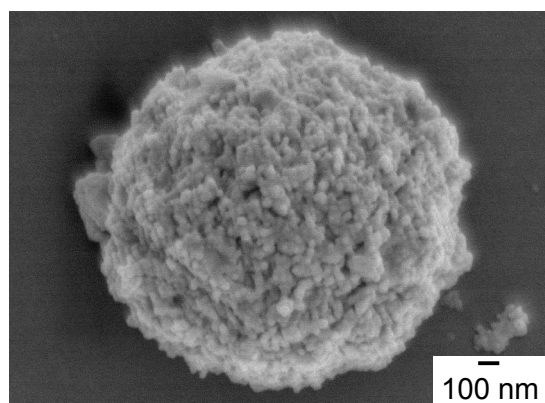

**Figure S1.** A magnified SEM image of smaller (2- $\mu\text{m}$ ) HAp/PLLA microspheres. The surface was uniformly coated with spherical HAp nanoparticles.

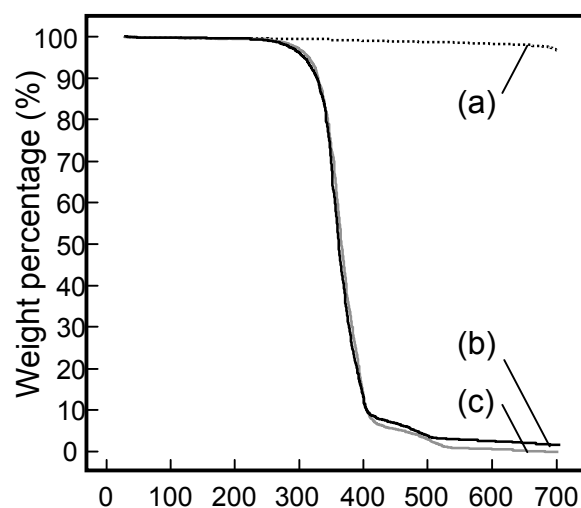

**Figure S2.** TG curves of (a) dried SHAp, (b) HAp/PLLA multihollow microspheres after washing and drying in vacuum, and (c) PLLA homopolymers (MW, 150,000 g/mol) measured at 10°C/min under N<sub>2</sub>
